# Supplementary material for: Sixfold phenyl embraces with substituted phenyl in PPh3 †
Source: Royal Society of Chemistry journal article supplement (doi:10.1039/b003559i), 2000-01-01
Supplement: b003559i.doc [file b003559i.doc]

**Supplementary Information for**

**Sixfold phenyl embraces with substituted phenyl in –PPh**3

**Marcia Scudder and Ian Dance***

*School of Chemistry, University of New South Wales, Sydney 2052, Australia*

* e-mail: I.Dance@unsw.edu.au

**Abstract:** Examination of the Cambridge Structural Database reveals that Ph4P+ cations and –PPh3 ligands in crystals associate through phenyl•••phenyl non–bonded interactions which are attractive, concerted, and widespread. The strongest and most prevalent interaction is the energetically favourable sextuple phenyl embrace (6PE) in which there are six concerted edge–to–face (EF) phenyl–phenyl interactions. Wehave questioned the extent to which substitution on one or more phenyl rings would interfere with XPh3 as a 6PE tecton. Substitution in the 4–position of Ph does not interfere with the formation of 6PEs. Substituents in other positions can be out of the interaction domain and not affect the 6PE, or if small like methyl they can form 6PE in which some of the EF motifs are replaced by methyl-to-face (MF). In some cases the substitution of Ph destroys the 6PE. Perfluorination, in (C6F5)3PPtCl2PtP(C6F5)3, does not obstruct occurrence of chains of intermolecular 6PE. Hetero-molecular 6PE occur, and could be deployed for generation of acentric crystals. The cation (*o*–NH2–C6H4)Ph3P+ can form chains of embraces analogous to the ZZI6PE, which is prevalent for Ph4P+.

|  |  |
| --- | --- |
| (a) | (b) |

Fig S1. (a) The 6PE formed in [ZUFJAL], where the component –PPh3 groups are in orthogonal flipper conformation. The approximate mirror symmetry of the two phenyl rings (ignoring the carboxyl substituent) can be seen. The (EF)4(OFF)2 interactions are marked on (b).
